# Supplementary material
Source: PubMed Central journal article supplement (PMC7954579)

**Supplemental Figure 1. *In vitro* suppression of HSP90 inhibitor-dependent HSP70 induction with increasing concentrations of AT7519 and modulation of select client proteins by western blot.**

**a.**

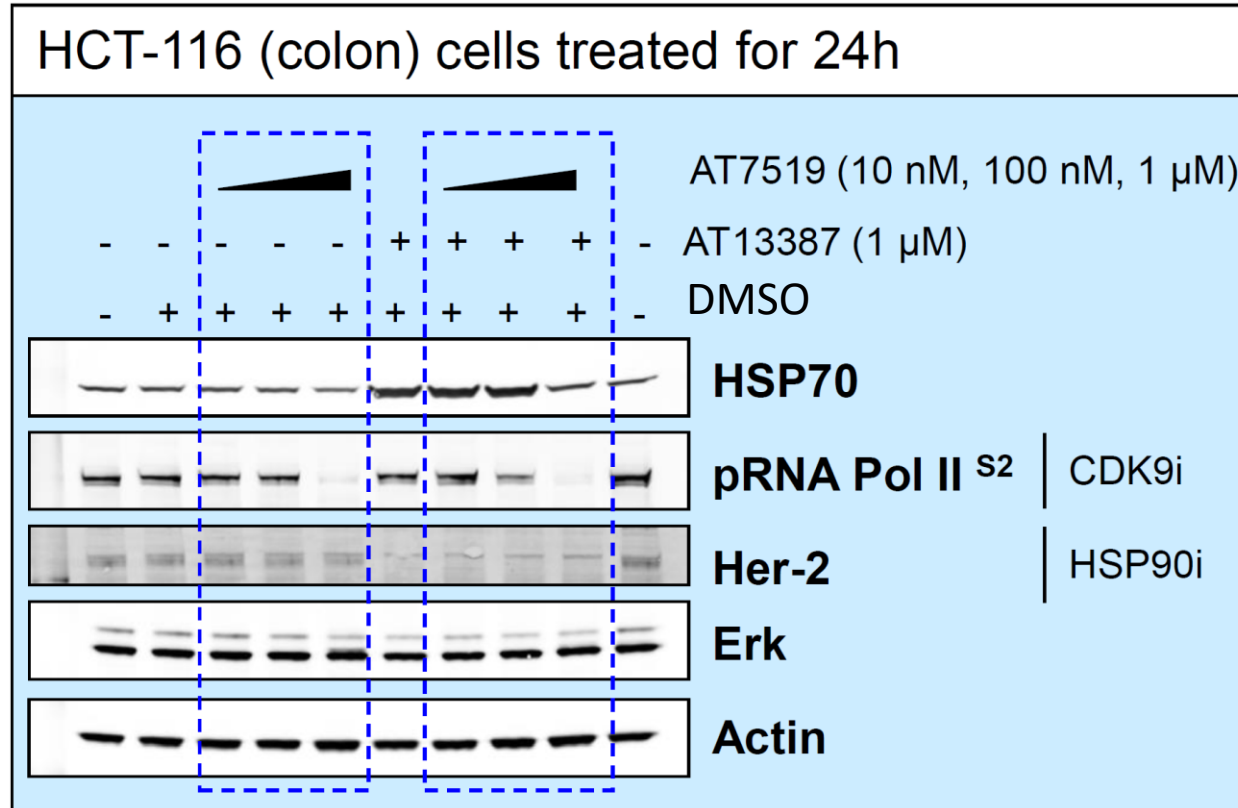

**b.**

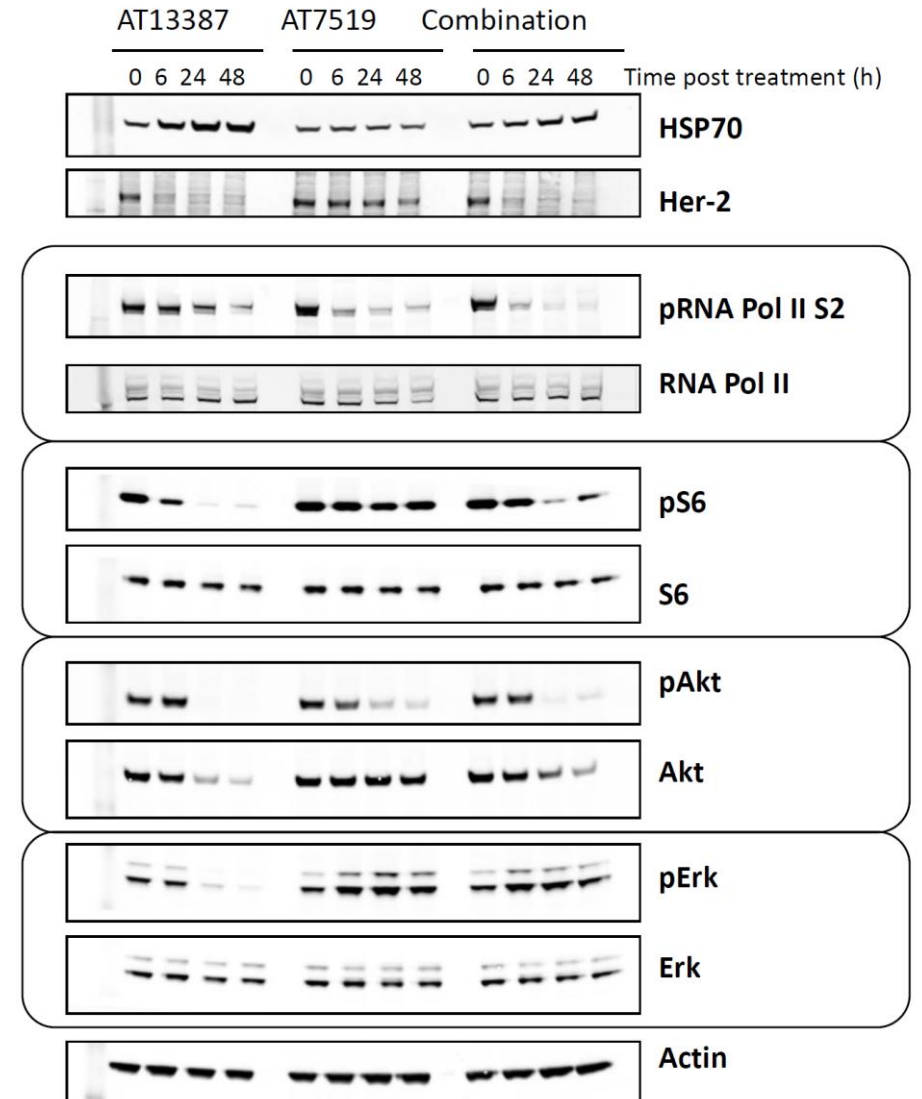

Supplement: NIHMS1677438-supplement-Supplemental_Figure_1.pdf [file NIHMS1677438-supplement-Supplemental_Figure_1.pdf]
